# Supplementary material for: MXene-derived Ti 3 C 2 –TiO 2 /BiOCl heterojunctions with enhanced visible-light photocatalysis and electrochemical activity
Source: Royal Society of Chemistry journal article supplement (doi:10.1039/d5nr04302f), 2025-12-27
Supplement: d5nr04302f1.pdf [file d5nr04302f1.pdf]

## **Supporting Information**

### **MXene-Derived $\text{Ti}_3\text{C}_2$ - $\text{TiO}_2$ /BiOCl Heterojunctions with Enhanced Visible-Light**

#### **Photocatalysis and Electrochemical Activity**

Maria Murtaza<sup>a</sup>, Shamaila Sajjad<sup>a\*</sup>, Tahira Bano <sup>a</sup>, Meer Dawood Khan Leghari<sup>b</sup> Anum Shahid,<sup>c</sup>

<sup>a</sup> Center for Interdisciplinary Research of Basic Science, International Islamic University, H-10 Islamabad, Pakistan.

<sup>b</sup> Swinburne University of Technology, Australia.

<sup>c</sup> LINC HUB, Islamabad, Pakistan.

Corresponding author e-mail. shalisajjad@yahoo.com, shamaila.sajjad@iiu.edu.pk

Corresponding Author Address: Professor Faculty of Sciences, International Islamic University, H-10, Islamabad, 44000, Pakistan.

## **2.1. Preparation methods**

### **2.1.1. Preparation of BiOCl**

BiOCl was prepared by the sol-gel method. 1.0 g BiCl<sub>3</sub> was dropwise included to 40 mL of ethanol and stirred for an hour as far as BiCl<sub>3</sub> dissolved completely to form homogeneous solution. Simultaneously, a second solution was obtained through dissolution of 0.1 g sodium dodecyl sulfate (SDS) in distilled water (20 mL) by stirring for 20 min. The third solution was prepared by a dissolution of 0.1 g urea in 20 mL distilled water under stirring over 20 min. These solutions were mixed simultaneously, the SDS solution and urea solution was added into BiCl<sub>3</sub> solution. The newly formed transparent mixture was blended for 1 h at 40°C until became homogeneous, the temperature was then raised to 80°C and stirred for 1 h. The product was rinsed with distilled water (5-6 repetitions) to remove possible contaminants. Subsequently, after filtration the precipitates were dried and calcined at 500°C for 5 hours to attain the final BiOCl product.

### **2.1.2. Preparation of TiO<sub>2</sub> and Ti<sub>3</sub>C<sub>2</sub>-TiO<sub>2</sub> hybrid structures**

Sol-gel technique was employed to synthesize TiO<sub>2</sub> nanoparticles by using a precursor titanium tetra butyl titanate (TBT). A mixture of deionized water and ethanol in a 2:3 proportion was prepared and 4–5 drops of HCl were incorporated into the solution. Then, 10.0 mL of TBT solution was gradually introduced into the final solution under constant stirring for duration of 30 min followed by sonication of the mixture. The resulting sol was placed in a vacuum oven at 160 °C for a time of 2–3 h. After centrifugation, the product was dried on hotplate and finely grounded to get the TiO<sub>2</sub> nanoparticles. For the preparation of Ti<sub>3</sub>C<sub>2</sub>-TiO<sub>2</sub> hybrid composite, 0.1 g graphite was

introduced into the  $\text{TiO}_2$  solution and sonicated. The product was further dried in a vacuum oven at 180–195°C for 2 hours and  $\text{Ti}_3\text{C}_2\text{-TiO}_2$  hybrid powder was obtained.

### **2.1.3. Synthesis of $\text{Ti}_3\text{C}_2\text{-TiO}_2/\text{BiOCl}$ composites.**

The 1.0 wt. %  $\text{Ti}_3\text{C}_2\text{-TiO}_2/\text{BiOCl}$  composite structures were prepared using a two-stage synthesis approach: the specific amount of  $\text{BiOCl}$  nanoplates were first dispersed into distilled water, and sonication was performed for 30 min to obtain a uniformly dispersed suspension. Afterward, the as-prepared  $\text{Ti}_3\text{C}_2\text{-TiO}_2$  MXene based hybrid dispersion was gradually introduced into the  $\text{BiOCl}$  solution while stirring. The above mixture was stirred for 2 hours to assure the  $\text{Ti}_3\text{C}_2\text{-TiO}_2$  uniformly coating on  $\text{BiOCl}$  nanoparticle. The composite obtained was centrifuged, repeatedly washed and then dried at 60 °C for 12 h. A calcination step was performed on the dried product at 400°C for 2 h to increase stability and crystallinity of the composite.  $\text{Ti}_3\text{C}_2\text{-TiO}_2$  are exhibited compositional variations with weight ratios from 1.0-4.0 wt. %. The schematic representation of the synthetic route for  $\text{Ti}_3\text{C}_2\text{-TiO}_2/\text{BiOCl}$  composite catalysts is given in manuscript Scheme 1.

### **2.1.4. Photocatalytic degradation**

The photocatalytic performance of  $\text{Ti}_3\text{C}_2\text{-TiO}_2/\text{BiOCl}$  composite catalysts for phenol degradation was determined. In dark experiment, absorption value of phenol was determined without exposure to light. For light experiment, 0.1 g of  $\text{Ti}_3\text{C}_2\text{-TiO}_2/\text{BiOCl}$  composite catalyst was added to 100 mL phenol solution (25 ppm). Illumination was provided by a 300W tungsten lamp with UV cutoff filter ( $\lambda > 420$  nm) was used to ensure visible light irradiation which had a wavelength range of 400–600 nm. The solution was stirred continuously to guarantee homogeneous blending of the catalyst and phenol. 5 mL aliquots were withdrawn from the solution at 60 min intervals and analyzed on a UV–vis spectrometer to check the degradation process. The charge transfer process of  $\text{Ti}_3\text{C}_2\text{-TiO}_2/\text{BiOCl}$  heterojunction can be further confirmed by comparing the band edge positions using Mullikan electronegativity theory, the following equations apply:

$$E_{VB} = \chi - E_c + 0.5 E_g$$

$$E_{CB} = E_{VB} + E_g$$

Where  $E_{VB}$  and  $E_{CB}$  are the edge potentials of the valance and conduction band,  $E_c$  represents the energy of free electrons on the hydrogen scale (4.50 eV), and  $\chi$  is absolute electronegativity.

### **Chemicals and Experimental Conditions**

All chemicals were of analytical grade and used without further purification. Bismuth chloride ( $\text{BiCl}_3$ ), Urea, Sodium dodecyl sulfate (SDS), Tetrabutyl titanate (TBT), Graphite powder, Ethanol, and Hydrochloric acid (HCl) were purchased from Sigma-Aldrich (USA), and deionized water was used throughout the experiments. Photocatalytic activity was evaluated under visible-light irradiation using phenol as a model organic pollutant. Electrochemical studies were carried out in a conventional three-electrode system using KOH alkaline electrolyte to investigate the charge-storage behavior of the prepared electrodes.

### **Characterization**

The crystalline composition of the synthesized specimens is examined by X-ray diffractometer (Rigaku D/MAX 2550) using Cu  $K\alpha$  radiation, the scan was performed from 20-90° with a current of 30 mA with 40 kV. Optical studies in the 200-600 nm are probed using a UV-visible diffuse reflectance spectrometer (UV-2600, Shimadzu, Japan) with Barium Sulphate ( $\text{BaSO}_4$ ) as a reflectance calibration standard. The FTIR spectral data of the samples were acquired using a (FT-IR, Bruker ALPHA) Fourier transform infrared spectrometer. In order to investigate the vibrational frequencies of the synthesized material, Raman spectroscopy is used by employing a Horiba Labram-HR 800 (Horiba Jobin-Yvon) with an argon laser having 514.0 nm wavelength and stimulating power of 20.0 mW with 100x resolution lens. Scanning electron microscopy (SEM, Zeiss ULTRA 55) was adopted to examine the morphology. Photoluminescence (PL) spectra were

recorded via Horiba Fluoromax-4 Spectrofluorimeter utilizing a wavelength of 500 nm. X-ray photoelectron spectroscopy (XPS) measurements were carried out via Thermo Scientific spectrometer (ESCALAB 250Xi) with Al K $\alpha$  radiation to analyze surface chemical states. Electrochemical analysis was performed using a combination of cyclic voltammetry (CV), Galvanostatic charge/discharge (GCD), Linear Sweep Voltammetry (LSV) and electrochemical impedance spectroscopy (EIS) by electrochemical workstation (Auto lab PGSTAT302N), where Hg/HgO served as reference electrode, platinum (Pt.) as a counter electrode and nickel foam impregnated slurry as a working electrode.

**Table.S1.** Elemental quantitative data of  $\text{Ti}_3\text{C}_2\text{-TiO}_2$  hybrid structure, BiOCl and 4.0%  $\text{Ti}_3\text{C}_2\text{-TiO}_2/\text{BiOCl}$  heterojunction.

| <b><math>\text{Ti}_3\text{C}_2\text{-TiO}_2</math></b> |                 |                 | <b>BiOCl</b>   |                 |                 | <b>4.0% <math>\text{Ti}_3\text{C}_2\text{-TiO}_2/\text{BiOCl}</math></b> |                 |                 |
|--------------------------------------------------------|-----------------|-----------------|----------------|-----------------|-----------------|--------------------------------------------------------------------------|-----------------|-----------------|
| <b>Element</b>                                         | <b>Weight %</b> | <b>Atomic %</b> | <b>Element</b> | <b>Weight %</b> | <b>Atomic %</b> | <b>Element</b>                                                           | <b>Weight %</b> | <b>Atomic %</b> |
| O K                                                    | 43.64           | 69.64           | <b>O K</b>     | 1.62            | 4.13            | <b>O K</b>                                                               | 12.43           | 29.88           |
| C K                                                    | 1.73            | 1.21            | <b>Bi M</b>    | 74.15           | 32.69           | <b>Ti K</b>                                                              | 21.63           | 36.20           |
| Ti K                                                   | 54.63           | 29.15           | <b>Cl K</b>    | 24.23           | 63.18           | <b>C K</b>                                                               | 11.39           | 13.63           |
| -                                                      | -               | -               | -              | -               | -               | <b>Bi M</b>                                                              | 42.99           | 7.89            |
| -                                                      | -               | -               | -              | -               | -               | <b>Cl K</b>                                                              | 11.56           | 12.40           |
|                                                        | 100             | 100             |                | 100             | 100             |                                                                          | 100             | 100             |

**Table S2.** Comparative investigation of photocatalytic degradation of different pollutants reported in literature.

| <b>Catalysts</b>                                                                  | <b>Compounds</b> | <b>Light Sources</b>   | <b>Reaction Time (min)</b> | <b>Degradation %</b> | <b>References</b> |
|-----------------------------------------------------------------------------------|------------------|------------------------|----------------------------|----------------------|-------------------|
| C doped TiO <sub>2</sub> -Ti <sub>3</sub> C <sub>2</sub>                          | Rhodamine B      | UV-Vis light           | 300                        | 94                   | [16]              |
| TiO <sub>2</sub> @Ti <sub>3</sub> C <sub>2</sub> /g-C <sub>3</sub> N <sub>4</sub> | RhB              | 300W Xe lamp           | 60                         | 99                   | [44]              |
| TiO <sub>2</sub> @Ti <sub>3</sub> C <sub>2</sub> /g-C <sub>3</sub> N <sub>4</sub> | Aniline          | 300 W Xe lamp          | 480                        | 66.4                 | [44]              |
| AgNPs/TiO <sub>2</sub> /Ti <sub>3</sub> C <sub>2</sub> T <sub>x</sub>             | Rhodamine B      | Stimulated Solar light | 120                        | 88                   | [45]              |
| AgNPs/TiO <sub>2</sub> /Ti <sub>3</sub> C <sub>2</sub> T <sub>x</sub>             | Methyl Blue      | Stimulated Solar light | 120                        | 96                   | [45]              |
| BiOBr/Ti <sub>3</sub> C <sub>2</sub>                                              | RhB              | UV-Vis light           | 180                        | 99                   | [46]              |
| Ti <sub>3</sub> C <sub>2</sub> -TiO <sub>2</sub> /BiOCl                           | Phenol           | Tungsten Lamp          | 300                        | 96                   | Present work      |

**Table S3.** Optical characteristics and absolute electronegativity of the photo catalyst (eV vs. vacuum)

| <b>Photo catalysts</b>                                            | <b><math>\chi</math> (eV)</b> | <b><math>E_g</math> (eV)</b> | <b><math>E_{CB}</math> (eV)</b> | <b><math>E_{VB}</math> (eV)</b> |
|-------------------------------------------------------------------|-------------------------------|------------------------------|---------------------------------|---------------------------------|
| BiOCl                                                             | 3.0                           | 2.9                          | 2.29                            | 0.59                            |
| TiO <sub>2</sub>                                                  | 5.81                          | 3.01                         | 2.68                            | -0.16                           |
| 1.0 wt. % Ti <sub>3</sub> C <sub>2</sub> -TiO <sub>2</sub> /BiOCl | -                             | 2.96                         | 2.69                            | -0.16                           |
| 2.0 wt.% Ti <sub>3</sub> C <sub>2</sub> -TiO <sub>2</sub> /BiOCl  | -                             | 2.93                         | 2.68                            | -0.15                           |
| 3.0 wt.% Ti <sub>3</sub> C <sub>2</sub> -TiO <sub>2</sub> /BiOCl  | -                             | 2.89                         | 2.66                            | -0.13                           |
| 4.0 wt. % Ti <sub>3</sub> C <sub>2</sub> -TiO <sub>2</sub> /BiOCl | -                             | 2.82                         | 2.62                            | -0.1                            |



**Table S4:** Comparison of the electrochemical performance of optimized 4 wt%  $\text{Ti}_3\text{C}_2\text{-TiO}_2/\text{BiOCl}$  electrode with representative MXene and MXene-based composites reported in recent literature

| Electrode material                                   | Electrolyte                 | Specific capacitance/capacity | Scan rate             | References   |
|------------------------------------------------------|-----------------------------|-------------------------------|-----------------------|--------------|
| $\text{Ti}_3\text{C}_2\text{-TiO}_2/\text{BiOCl}$    | 1M KOH                      | $609 \text{ Cg}^{-1}$         | $5 \text{ mVs}^{-1}$  | Present work |
| $\text{TiO}_2\text{-Ti}_3\text{C}_2\text{T}_x$ MXene | 1M KOH                      | $117 \text{ Fg}^{-1}$         | $10 \text{ mVs}^{-1}$ | [57]         |
| $\text{TiO}_2\text{-Ti}_3\text{C}_2\text{T}_x$       | 6M KOH                      | $143 \text{ Fg}^{-1}$         | $5 \text{ mVs}^{-1}$  | [58]         |
| MXene coated CNFs                                    | 1M $\text{Na}_2\text{SO}_4$ | $514 \text{ Fg}^{-1}$         | $0.5 \text{ Ag}^{-1}$ | [59]         |
| $\text{Ti}_3\text{C}_2$ MXene                        | 1M KOH                      | $370 \text{ Fg}^{-1}$         | $1 \text{ Ag}^{-1}$   | [60]         |
